# Supplementary material for: A dynamic and adaptive network of cytosolic interactions governs protein export by the T3SS injectisome
Source: PubMed Central journal article supplement (PMC5490264; doi:10.1038/ncomms15940), 2017-06-27
Supplement: ncomms15940-s1.pdf [file ncomms15940-s1.pdf]

File name: Supplementary Information

Description: Supplementary Figures, Supplementary Tables and Supplementary References

File name: Supplementary Movie 1

Description: EGFP-YscQ localization time course with exposure of 100 ms / frame (frame rate 1/180 ms)

File name: Supplementary Movie 2

Description: EGFP-YscQ localization time course with exposure of 40 ms / frame (frame rate 1/120 ms)

File name: Supplementary Movie 3

Description: EGFP-YscQ localization time course with exposure of 15 ms / frame (frame rate 1/95 ms)

File name: Supplementary Movie 4

Description: EGFP-YscL localization time course with exposure of 100 ms / frame (frame rate 1/180 ms)

File name: Supplementary Movie 5

Description: EGFP-YscL localization time course with exposure of 40 ms / frame (frame rate 1/120 ms)

File name: Supplementary Movie 6

Description: EGFP-YscL localization time course with exposure of 15 ms / frame (frame rate 1/95 ms)

File name: Peer Review File

Description:

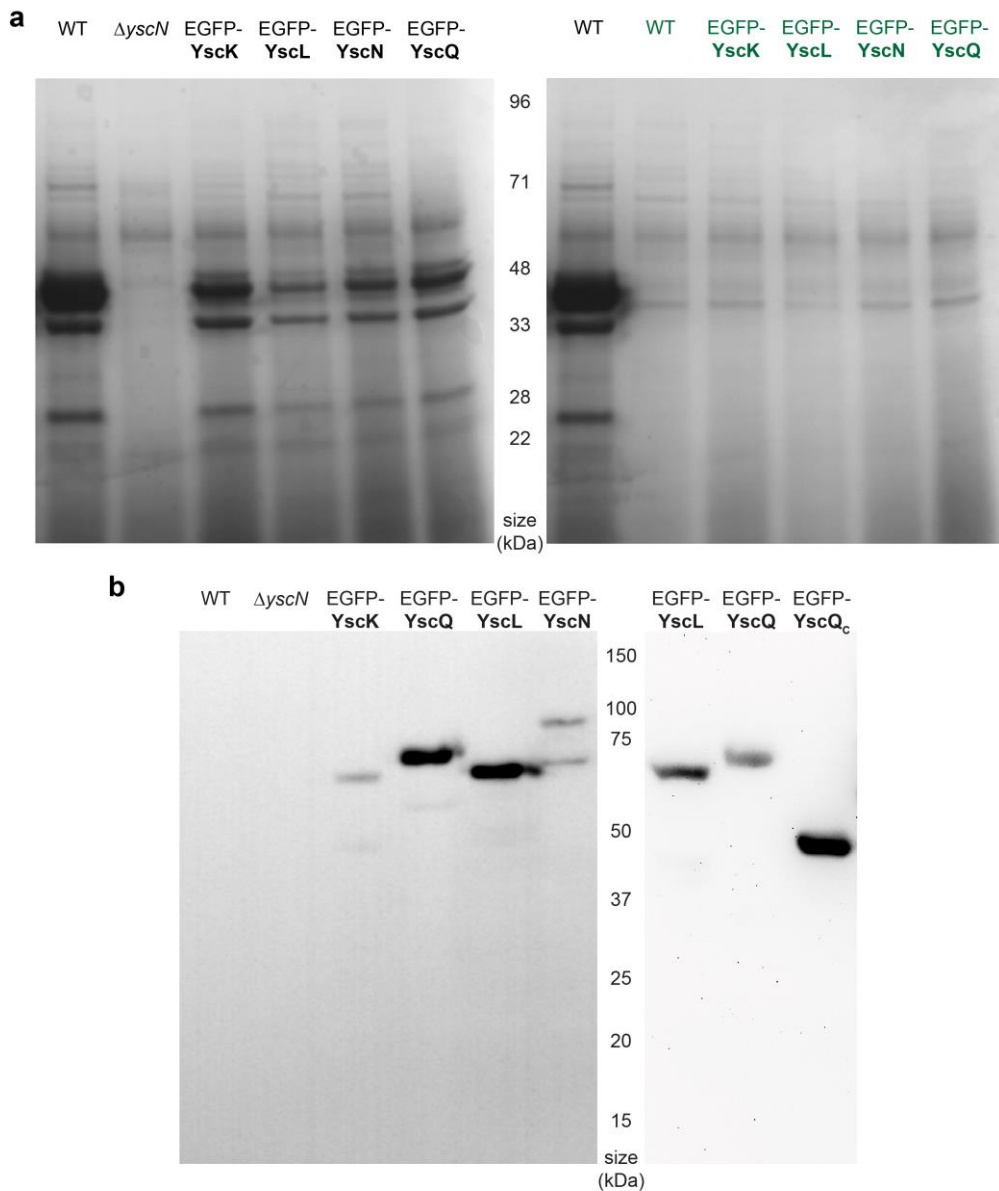

**Supplementary Fig. 1: Secretion assay and immunoblot showing the functionality and stability of the used EGFP fusion proteins**

**a:** Secretion profile (Coomassie staining of TCA-precipitated proteins in the culture supernatant after three hours of incubation at 37°C) of the indicated strains (wild-type, WT, and  $\Delta yscN$  strains as positive and negative controls, and strains expressing EGFP fusion proteins as indicated from their native promoter on the pYV virulence plasmid) under secreting conditions (absence of  $Ca^{2+}$ , black) and non-secreting conditions (presence of  $Ca^{2+}$ , green).

**b:** Immunoblot anti-GFP of total cellular proteins in the indicated strains, as above. To assess the stability of the fusion proteins, untreated total cellular proteins were analysed using anti-GFP antibodies. For the fusions to YscK, YscQ, YscQ<sub>c</sub>, and YscL, only minor (<5% intensity) degradation bands with molecular weights about 15-20 kDa below can be detected, similar to earlier results<sup>1</sup>. For EGFP-YscN, this degradation band is stronger. Importantly, no band corresponding to free EGFP (25-30 kDa) could be detected for any strain.

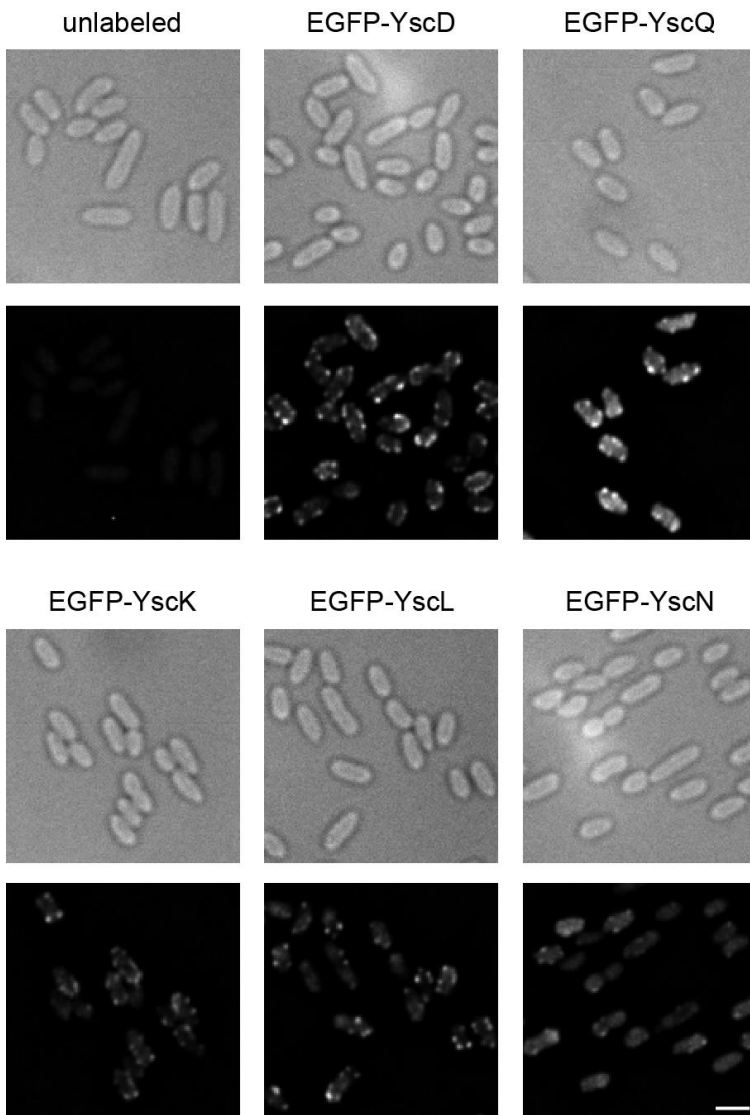

**Supplementary Fig. 2: The overall localization of the soluble T3SS components does not change upon induction of secretion.**

All soluble T3SS components localize in membrane foci under secreting conditions. Deconvoluted micrographs of bacteria expressing N-terminal EGFP fusions of the respective proteins under secreting conditions (see **Fig. 1b** for non-secreting conditions). The representative micrographs shown allow the comparison of fluorescence intensity. Each strain was imaged in three to four independent experiments yielding reproducible results. Scale bar, 2  $\mu\text{m}$ .

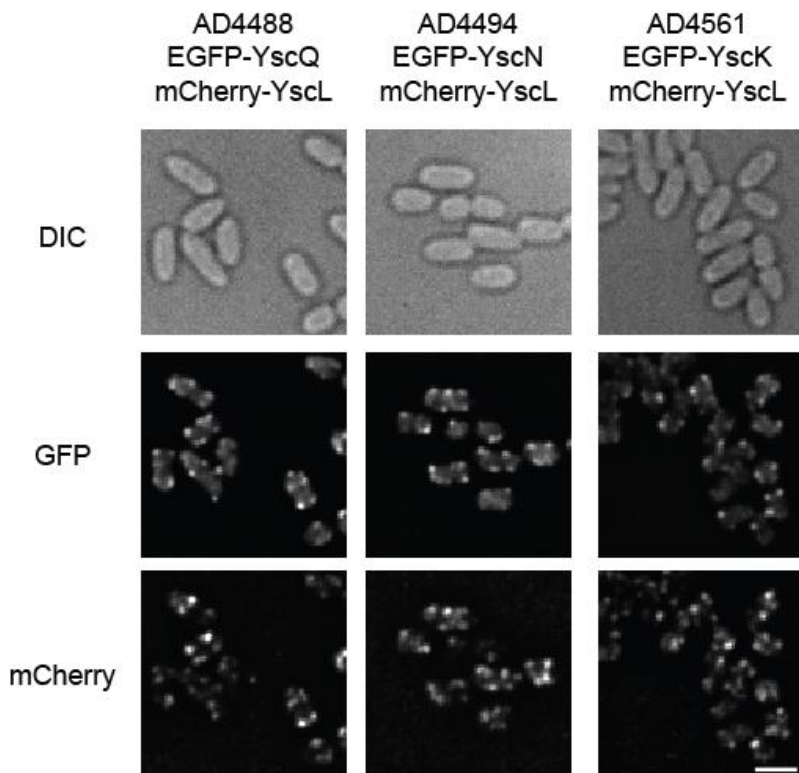

**Supplementary Fig. 3: The soluble T3SS components colocalize with each other in double labelled bacteria.**

Micrographs of EGFP and mCherry fluorescence in strains coexpressing two labelled soluble T3SS components under non-secreting conditions (see **Fig. 1c** for overlays). Each strain was imaged in three independent experiments yielding reproducible results. Scale bar, 2  $\mu$ m.

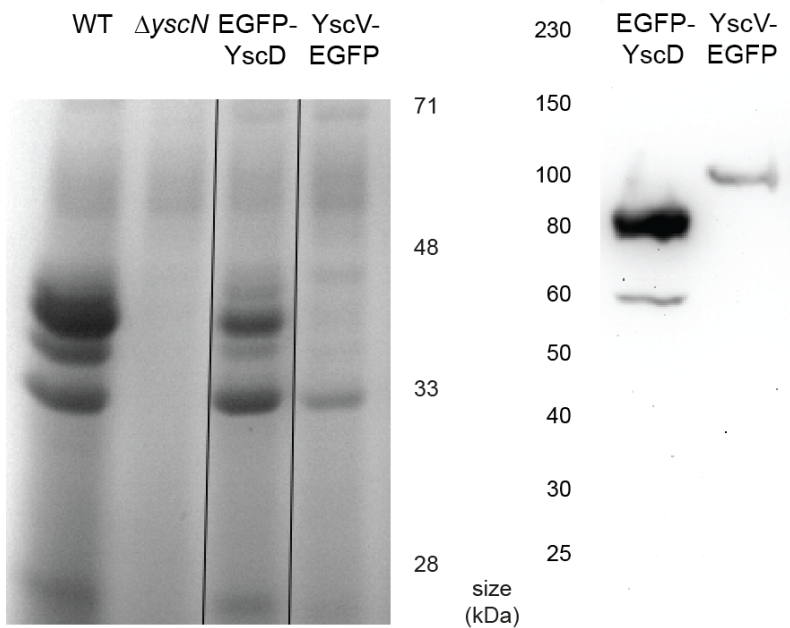

**Supplementary Fig. 4: Stability and functionality of fluorescent fusions to the membrane-bound T3SS components YscD and YscV**

Secretion profile (Coomassie staining of TCA-precipitated proteins in the culture supernatant after three hours of incubation at 37°C; left side) and immunoblot using an anti-GFP antibody (right side) of strains expressing EGFP-YscD or YscV-EGFP, as indicated. All samples were run and analysed on the same gel; vertical lines indicate omission of intermediate lanes.

Secretion of effectors is slightly decreased in the strain expressing EGFP-YscD, and strongly reduced in YscV-EGFP. Numbers and lines indicate protein size in kDa. The expected size of the fusion proteins is 75.2 kDa (EGFP-YscD) and 106.6 kDa (YscV-EGFP). The majority of fusion proteins runs at the expected level. A weak degradation band is visible for EGFP-YscD, likely representing degradation within YscD. Importantly, no band is visible in the range of GFP (25-30 kDa), indicating that the observed fluorescence is not due to cleavage of fluorophores.

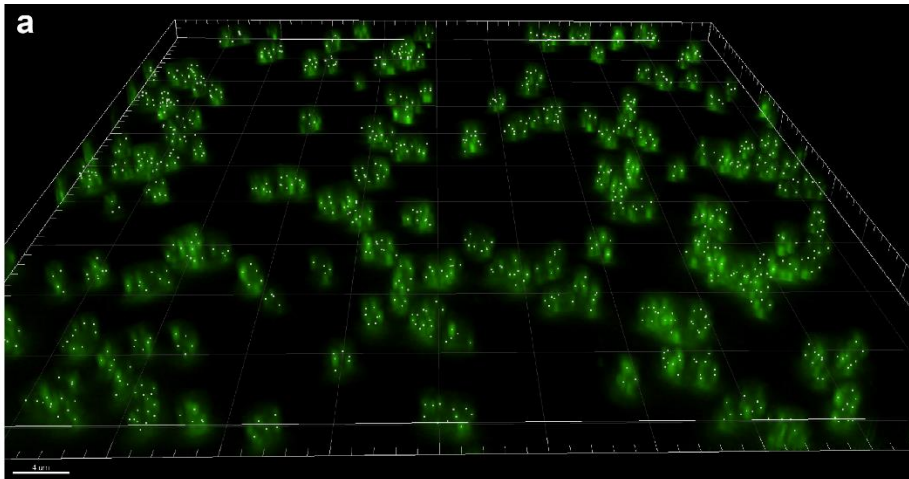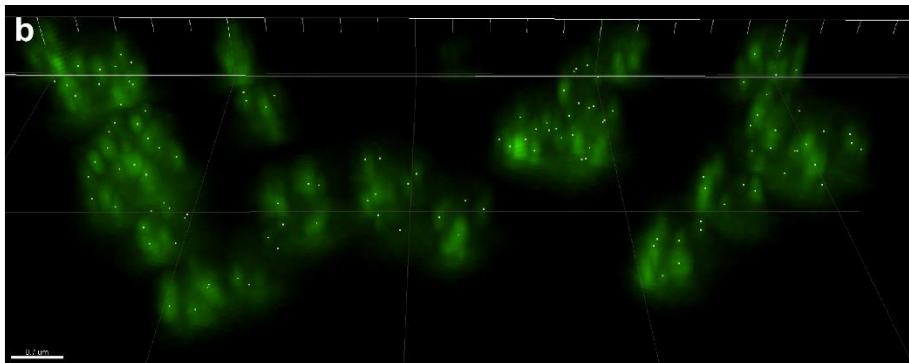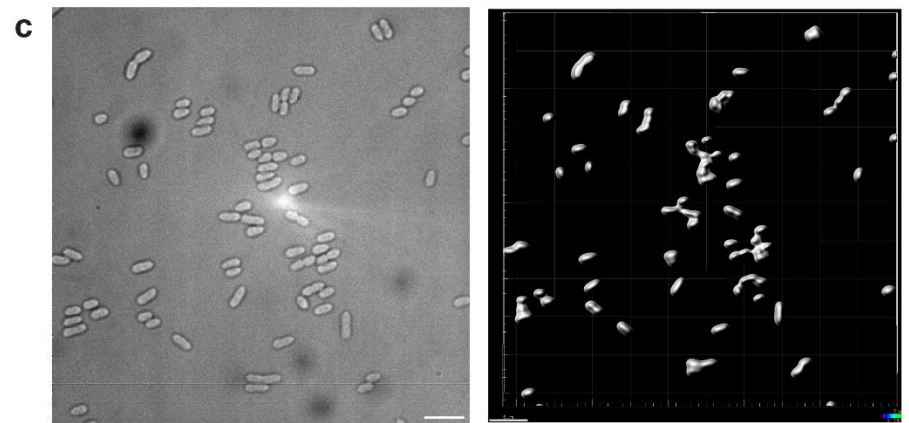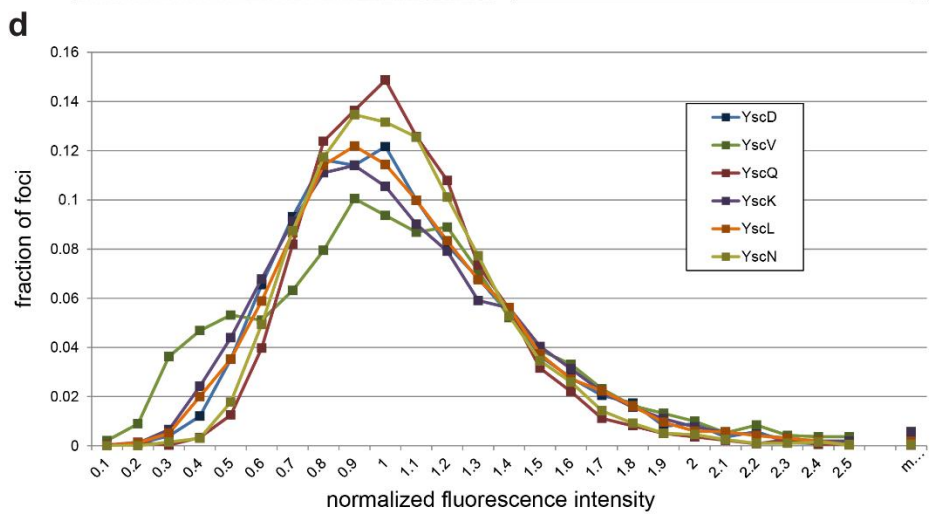

**Supplementary Fig. 5: Determination of the stoichiometry of the cytosolic complex**

**a, b:** Overview and close-up view of three-dimensional fluorescence distribution and detection of fluorescent foci. Three-dimensional views of fluorescence distribution in strain ADTM4520 expressing EGFP-YscL, and centres of detected spots (green points). Height of z stack: 1.8  $\mu\text{m}$ : scale bars: 4  $\mu\text{m}$  (overview), 0.7  $\mu\text{m}$  (close-up)

**c:** Representation of the region used to determine the average fluorescence background in an unlabelled strain (right) in comparison to the corresponding DIC image of the centre frame (left). Scale bars, 5  $\mu\text{m}$ .

**d:** Normalized fluorescence intensity of detected foci in strains expressing N-terminal EGFP fusions of the respective proteins (with the exception of YscV-EGFP) under non-secreting conditions. Data as shown in **Fig. 1e**, average fluorescence intensities set to 1 for each strains. m..., more than 2.5x average intensity.

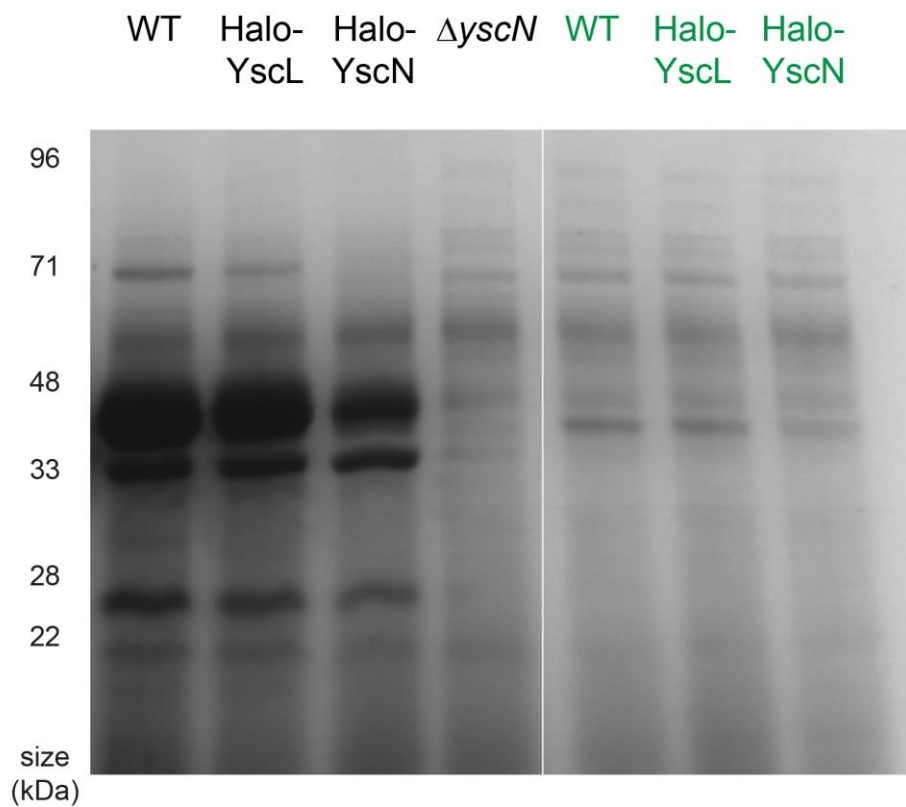

**Supplementary Fig. 6: Secretion assay showing the functionality of the used Halo-tagged proteins**

Secretion profile (Coomassie staining of TCA-precipitated proteins in the culture supernatant after three hours of incubation at 37°C) of the indicated strains under secreting conditions (absence of  $Ca^{2+}$ , black) and non-secreting conditions (presence of  $Ca^{2+}$ , green). All samples were analysed on the same gel, the white line indicates the omission of an intermediate lane.



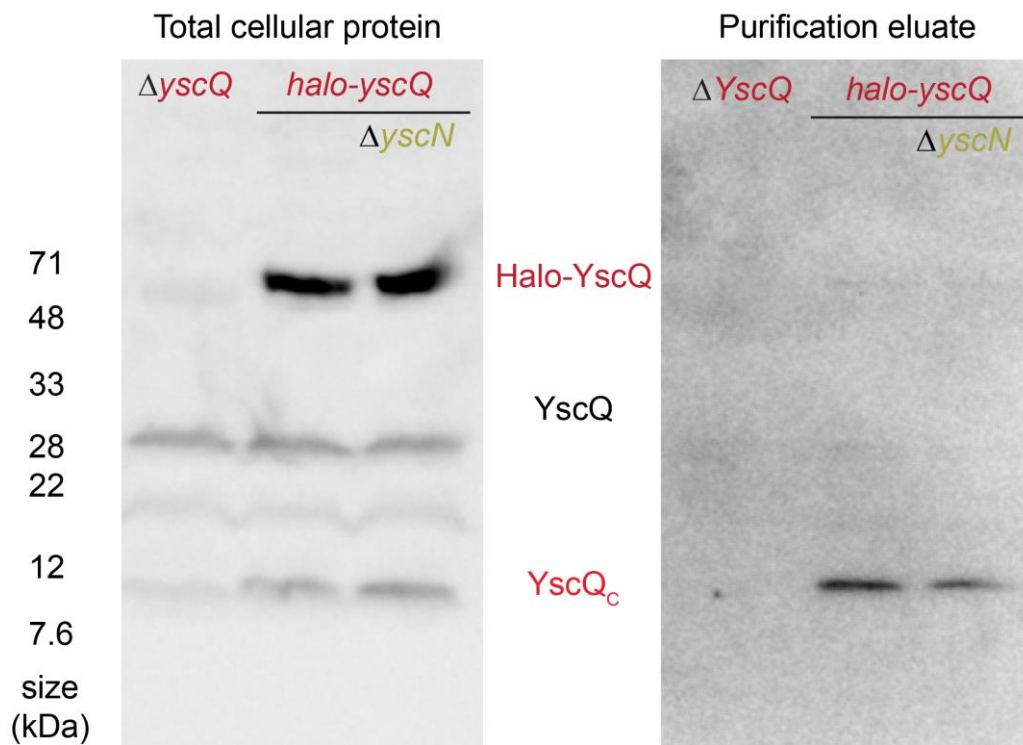

**Supplementary Fig. 7: Expression of Halo-YscQ and YscQ<sub>c</sub> is not affected by deletion of YscN**

Immunoblots using a polyclonal antibody directed against YscQ. Left side, total cellular protein from  $2 \times 10^8$  bacteria; right side, purification eluate from  $2 \times 10^9$  bacteria of the indicated strains. Standard protein sizes in kDa indicated on the left side, expected band sizes for Halo-YscQ (69.5 kDa), YscQ (34.4 kDa), and YscQ<sub>c</sub> (10,0 kDa) indicated in the centre.

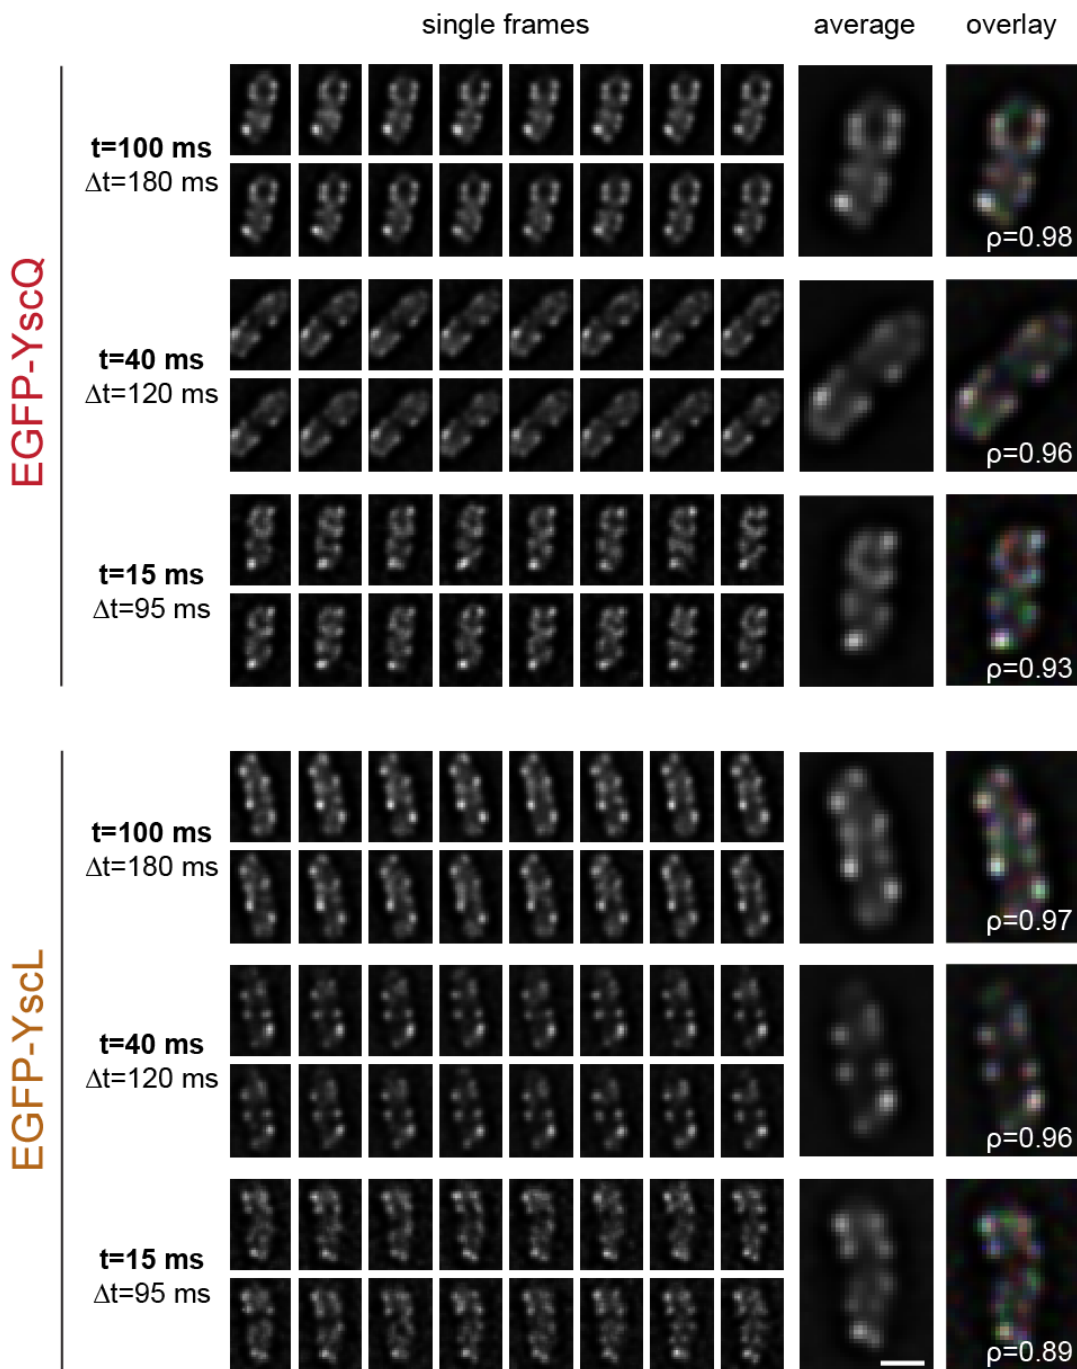

**Supplementary Fig. 8: Highly time-resolved fluorescence microscopy indicates movement of complexes through the cytosol**

Left: consecutive deconvoluted frames of time course microscopy visualizing EGFP-YscQ (top half) or EGFP-YscL (bottom half) under non-secreting conditions. Exposure time and frame rate (= exposure time + data transfer time) as indicated. Centre: Average of micrographs on the left. Right: overlay of three frames (red, green, blue channel) with  $\Delta t = 540\text{-}570$  ms. White indicates overlapping fluorescence, whereas colours indicate dynamic fluorescence.  $\rho$ , Pearson correlation coefficient, average between the three images displayed in the overlay. Scale bar, 1  $\mu\text{m}$ .

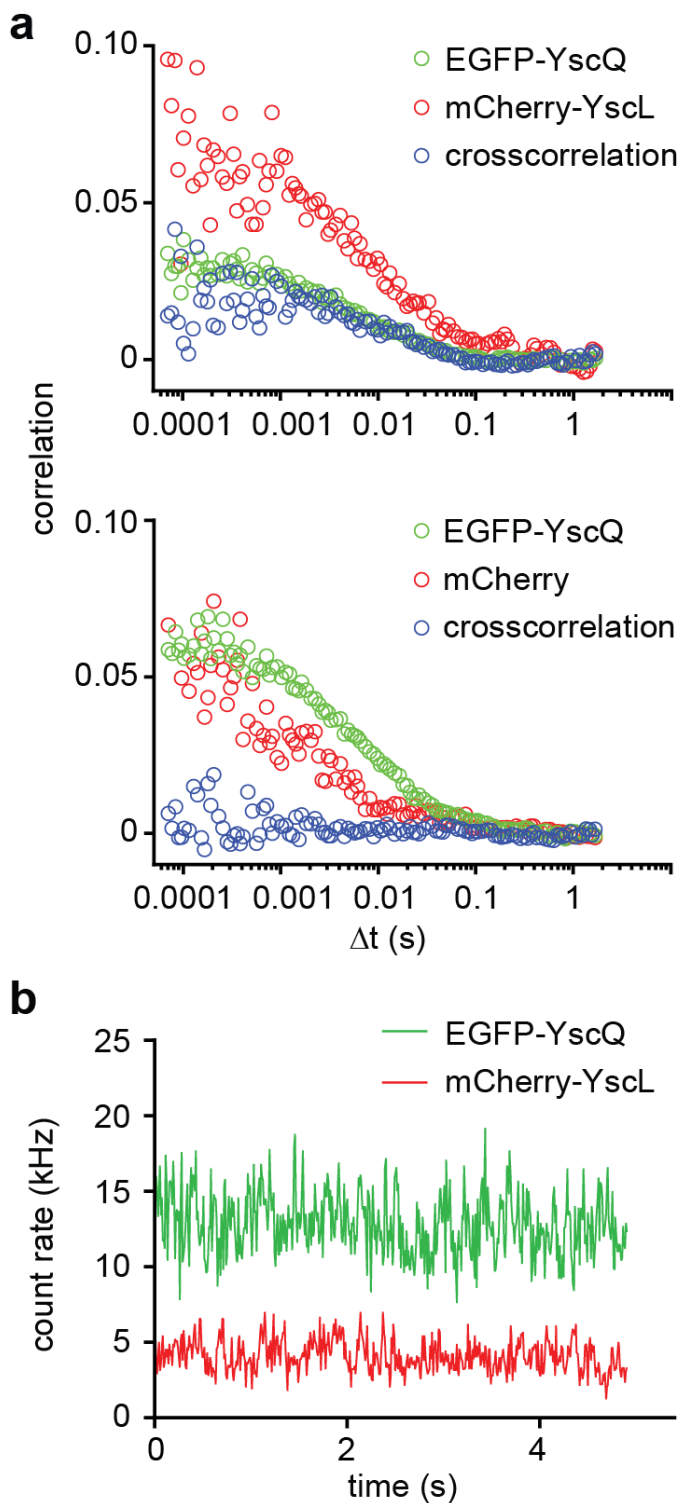

**Supplementary Fig. 9: Cytosolic interactions between YscL and YscQ can be detected in live bacteria.**

**a:** Cytosolic auto-correlation curves for given proteins (red and green circles), and cross-correlation (blue circles) for a strain expressing EGFP-YscQ and mCherry-YscL in a  $\Delta yscD$  background (top) and the respective negative control (EGFP-YscQ, free mCherry,  $\Delta yscD$ ).

**b:** Representative intensity traces for EGFP-YscQ and mCherry-YscL.

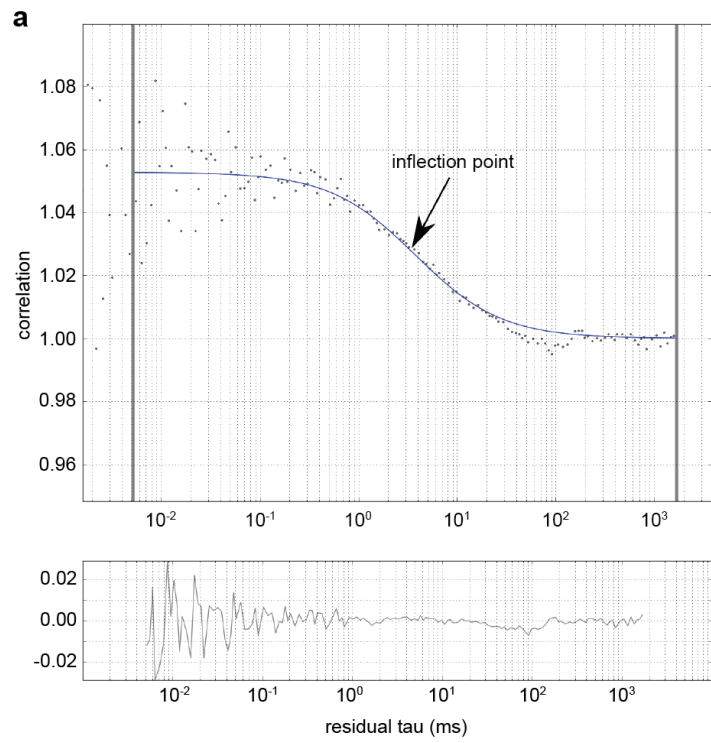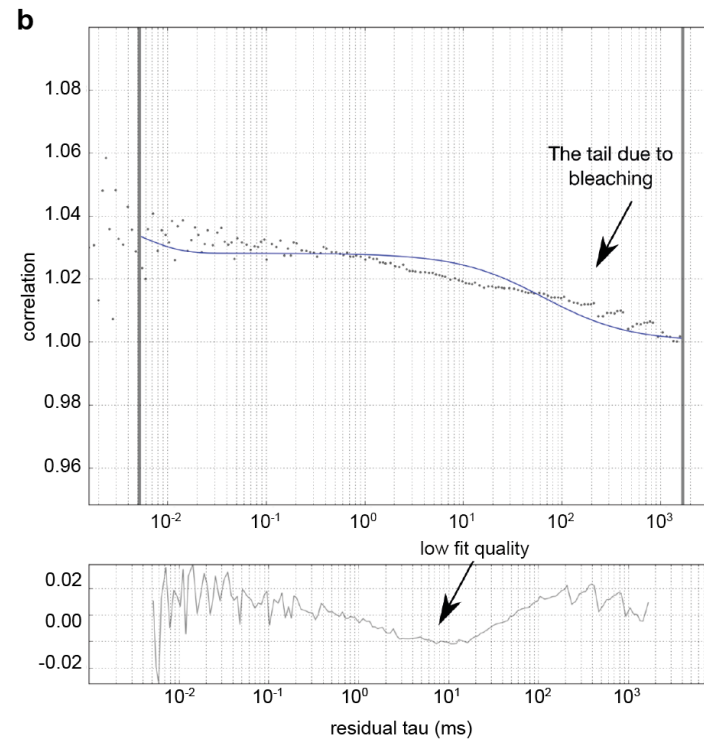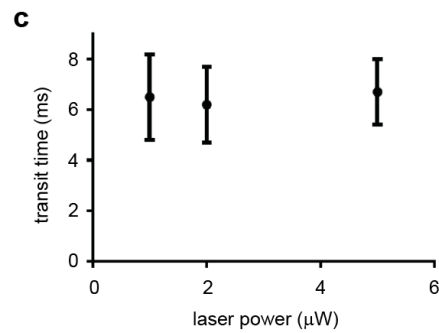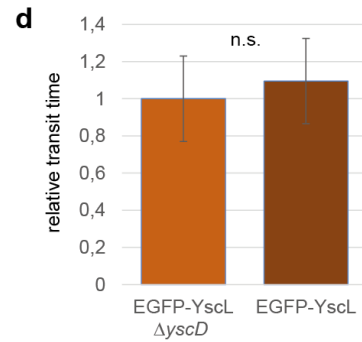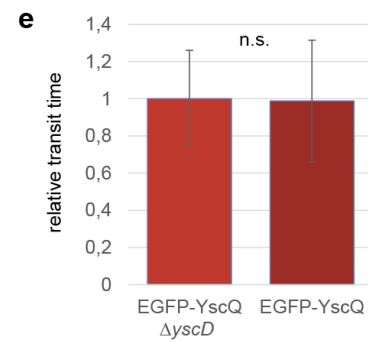

**Supplementary Fig. 10: Fluorescence correlation spectroscopy quality control and additional measurements**

**a, b:** Snapshots from FoCuS-point software<sup>2</sup>, showing autocorrelation data and fits for a representative FCS measurement (**a**) and a measurement, which was excluded due to bad fit quality caused by significant photobleaching (**b**).

**c:** Control experiment measuring the average transit time of EGFP-YscQ under non-secreting conditions, using different laser powers as indicated. Decreasing values for higher laser powers would be indicative of significant photobleaching<sup>3</sup>; this was not observed for our data. Error bars represent standard deviation from the mean of at least 10 curves.

**d, e:** The deletion of YscD does not influence the diffusion of EGFP-YscL or EGFP-YscQ. Transit times were measured in parallel for bacteria expressing EGFP-YscL (**d**) or EGFP-YscQ (**e**) expressed from their native genetic location, and otherwise WT (dark bars) or  $\Delta yscD$  (light bars) (n=13-29, error bars represent standard deviation). The difference between WT strain and the respective  $\Delta yscD$  strains is not statistically significant (n.s.) in a two-tailed homoscedastic t-test.

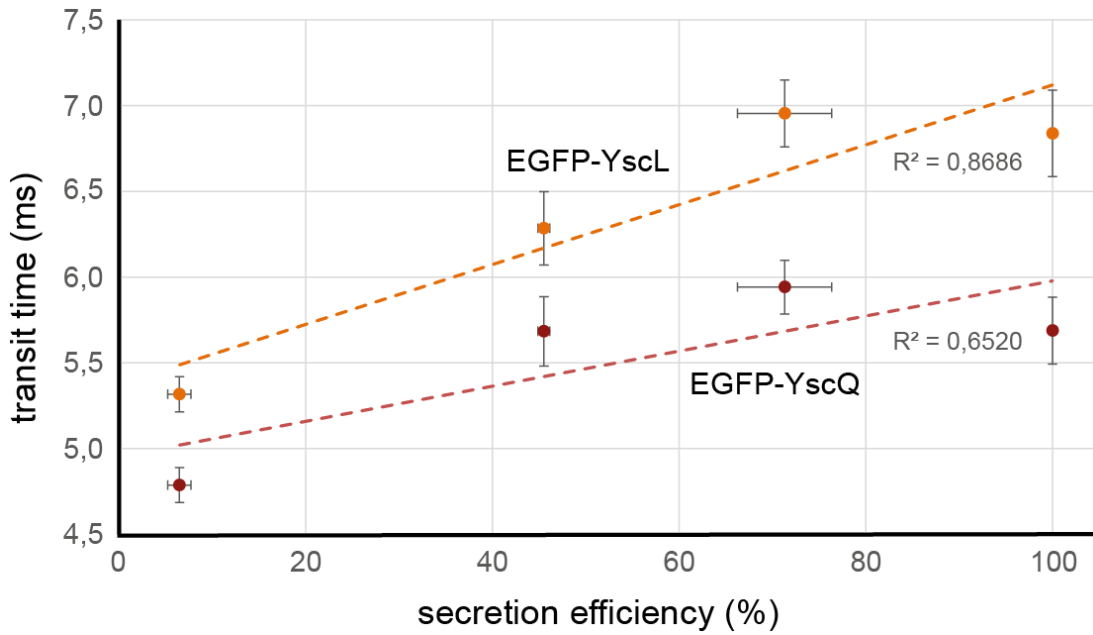

**Supplementary Fig. 11: Correlation between secretion efficiency and mobility of the soluble T3SS components.**

Correlation between secretion efficiency of a wild-type strain (x-axis, normalized to maximal efficiency), and transit times of EGFP-YscL (dark orange) and EGFP-YscQ (dark red) in the respective  $\Delta yscD$  strains under the same conditions. Error bars represent standard errors of the mean value of the secretion efficiency (x axis, normalized to the maximal rate,  $n = 3$ ), and the transit time (y axis,  $n = 64-158$ ).

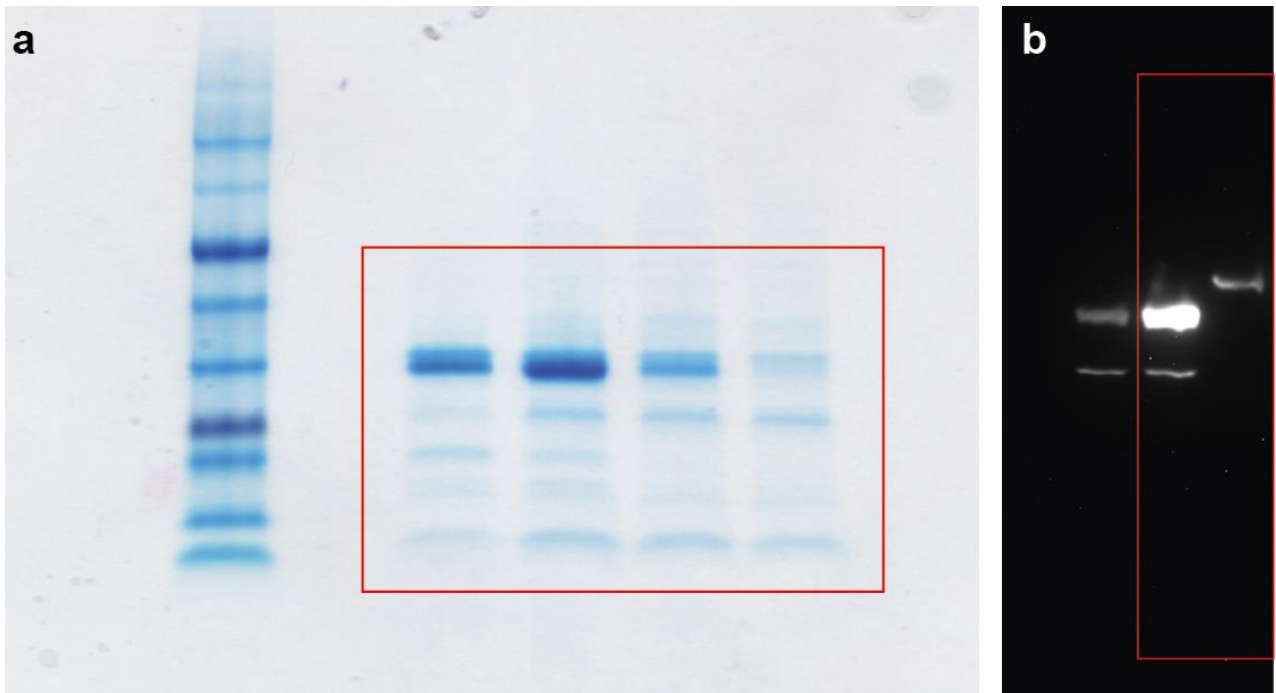

**Supplementary Fig. 12: Uncropped versions of displayed gels and immunoblots**

**a:** Uncropped version of the gel displayed in **Fig. 3d**.

**b:** Uncropped version of the immunoblot displayed in **Supplementary Fig. 4b**.

Red boxes indicate the approximate area displayed in the respective figures.

## Supplementary Table 1

### Homologous proteins and their function in various families of T3SS and the flagellum

General Sct names<sup>4</sup> and species-specific protein names are given for well-studied members of the respective T3SS families. -, no clear homologue present.

| Functional name                              | Sct name | <i>Yersinia</i> | <i>Shigella</i> | <i>Salmonella</i><br><i>SPI-1</i> | <i>Escherichia</i><br><i>coli</i> | Flagellar<br>homologue |
|----------------------------------------------|----------|-----------------|-----------------|-----------------------------------|-----------------------------------|------------------------|
| Secretin                                     | SctC     | YscC            | MxiD            | InvG                              | EscC                              | -                      |
| Outer MS-ring protein                        | SctD     | YscD            | MxiG            | PrgH                              | EscD                              | -                      |
| Inner MS-ring protein                        | SctJ     | YscJ            | MxiJ            | PrgK                              | EscJ                              | FliF                   |
| Minor export apparatus protein               | SctR     | YscR            | Spa24 (SpaP)    | SpaP                              | EscR                              | FliP                   |
| Minor export apparatus protein               | SctS     | YscS            | Spa9 (SpaQ)     | SpaQ                              | EscS                              | FliQ                   |
| Minor export apparatus protein               | SctT     | YscT            | Spa29 (SpaR)    | SpaR                              | EscT                              | FliR                   |
| Export apparatus switch protein              | SctU     | YscU            | Spa40 (SpaS)    | SpaS                              | EscU                              | FliB                   |
| Major export apparatus protein               | SctV     | YscV            | MxiA            | InvA                              | EscV                              | FliA                   |
| Accessory cytosolic protein                  | SctK     | YscK            | MxiK            | OrgA                              | -                                 | -                      |
| C-ring protein                               | SctQ     | YscQ            | Spa33 (SpaO)    | SpaO                              | EscQ                              | FliM + FliN            |
| Regulator (stator)                           | SctL     | YscL            | MxiN            | OrgB                              | EscL (Orf5)                       | FliH                   |
| ATPase                                       | SctN     | YscN            | Spa47 (SpaL)    | InvC                              | EscN                              | FliI                   |
| Stalk                                        | SctO     | YscO            | Spa13 (SpaM)    | InvI                              | Orf15                             | FliJ                   |
| Needle filament protein                      | SctF     | YscF            | MxiH            | PrgI                              | EscF                              | -                      |
| Inner rod protein                            | SctI     | YscI            | MxiI            | PrgJ                              | EscI (rOrf8)                      | -                      |
| Needle length regulator                      | SctP     | YscP            | Spa32 (SpaN)    | InvJ                              | EscP (Orf16)                      | FliK                   |
| Hydrophilic translocator, needle tip protein |          | LcrV            | IpaD            | SipD                              | -                                 | -                      |
| Hydrophobic translocator, pore protein       |          | YopB            | IpaB            | SipB                              | EspD                              | -                      |
| Hydrophobic translocator, pore protein       |          | YopD            | IpaC            | SipC                              | EspB                              | -                      |
| Pilotin                                      |          | YscW            | MxiM            | InvH                              | -                                 | -                      |
| Gatekeeper                                   | SctW     | YopN            | MxiC            | InvE                              | SepL                              | -                      |



## Supplementary Table 2

### List of strains and plasmids used in this study

Relevant genotype of *Y. enterocolitica* strains. All strains are based on the multi-effector knock-out auxotrophic strain IML421*asd*, which is an E40-based strain.

| Strain name       | Relevant strain characteristics of the pYV virulence plasmid                                                                                                                            | References |
|-------------------|-----------------------------------------------------------------------------------------------------------------------------------------------------------------------------------------|------------|
| IML421 <i>asd</i> | pYV40 <i>yopO</i> <sub>Δ2-427</sub> <i>yopE</i> <sub>21</sub> <i>yopH</i> <sub>Δ1-352</sub> <i>yopM</i> <sub>23</sub> <i>yopP</i> <sub>23</sub> <i>yopT</i> <sub>135</sub> Δ <i>asd</i> | 5          |
| AD4085            | IML421 <i>egfp-yscQ</i>                                                                                                                                                                 | 5          |
| AD4165            | IML421 <i>yscV-egfp</i>                                                                                                                                                                 | this study |
| AD4306            | IML421 <i>egfp-yscD</i>                                                                                                                                                                 | 1          |
| AD4392            | IML421 <i>egfp-yscQ</i> , Δ <i>yscN</i>                                                                                                                                                 | this study |
| AD4393            | IML421 <i>egfp-yscQ</i> , <i>mCherry-yscD</i>                                                                                                                                           | this study |
| AD4396            | IML421 <i>egfp-yscQ</i> <sub>M218A</sub>                                                                                                                                                | this study |
| AD4411            | IML421 <i>egfp-yscQ</i> Δ <i>yscD</i>                                                                                                                                                   | this study |
| AD4419            | IML412 Δ <i>yscQ</i>                                                                                                                                                                    | 1          |
| AD4461            | IML421 <i>halo-yscQ</i>                                                                                                                                                                 | this study |
| AD4463            | IML421 <i>halo-yscQ</i> Δ <i>yscN</i>                                                                                                                                                   | this study |
| AD4474            | IML421 <i>egfp-yscK</i>                                                                                                                                                                 | this study |
| AD4476            | IML421 <i>egfp-yscK</i> Δ <i>yscD</i>                                                                                                                                                   | this study |
| AD4478            | IML421 <i>egfp-yscK</i> Δ <i>yscQ</i>                                                                                                                                                   | this study |
| AD4483            | IML421 <i>egfp-yscL</i> Δ <i>yscD</i>                                                                                                                                                   | this study |
| AD4484            | IML421 <i>egfp-yscL</i> Δ <i>yscN</i>                                                                                                                                                   | this study |
| AD4485            | IML421 <i>egfp-yscL</i> Δ <i>yscQ</i>                                                                                                                                                   | this study |
| AD4486            | IML421 <i>egfp-yscN</i> Δ <i>yscD</i>                                                                                                                                                   | this study |
| AD4487            | IML421 <i>egfp-yscN</i> Δ <i>yscL</i>                                                                                                                                                   | this study |
| AD4488            | IML421 <i>egfp-yscQ</i> <i>mCherry-yscL</i>                                                                                                                                             | this study |
| AD4489            | IML421 <i>egfp-yscQ</i> <i>mCherry-yscL</i> Δ <i>yscD</i>                                                                                                                               | this study |
| AD4494            | IML421 <i>egfp-yscN</i> <i>mCherry-yscL</i>                                                                                                                                             | this study |
| AD4561            | IML421 <i>egfp-yscK</i> <i>mCherry-yscL</i>                                                                                                                                             | this study |
| ADMH4534          | IML421 <i>halo-yscQ</i> Δ <i>yscD</i>                                                                                                                                                   | this study |
| ADTM4514          | IML421 <i>egfp-yscN</i>                                                                                                                                                                 | this study |
| ADTM4520          | IML421 <i>egfp-yscL</i>                                                                                                                                                                 | this study |
| ADTM4525          | IML421 <i>halo-yscL</i>                                                                                                                                                                 | this study |

## Expression and suicide vectors

| Plasmid             | Relevant characteristics                                                                                      | References |
|---------------------|---------------------------------------------------------------------------------------------------------------|------------|
| pAD475              | pBAD:: <i>egfp</i> ( <i>egfp</i> cloned in pBAD BglII/EcoRI sites)                                            | this study |
| pAD476              | pBAD:: <i>mCherry</i> ( <i>mCherry</i> cloned in pBAD BglII/EcoRI sites)                                      | this study |
| pAD208              | pKNG101 <i>yscV-egfp</i> ( <i>egfp</i> and flexible linker cloned in-frame at the C-terminus of <i>yscV</i> ) | this study |
| pAD447              | pKNG101 <i>halo-yscQ</i> ( <i>halo</i> and flexible linker cloned in-frame at the N-terminus of <i>yscQ</i> ) | this study |
| pAD474              | pKNG101 <i>egfp-yscK</i> ( <i>egfp</i> and flexible linker cloned in-frame at the N-terminus of <i>yscK</i> ) | this study |
| pADTM502            | pKNG101 <i>egfp-yscN</i> ( <i>egfp</i> and flexible linker cloned in-frame at the N-terminus of <i>yscN</i> ) | this study |
| pADTM511            | pKNG101 <i>egfp-yscL</i> ( <i>egfp</i> and flexible linker cloned in-frame at the N-terminus of <i>yscL</i> ) | this study |
| pADTM513            | pKNG101 <i>halo-yscL</i> ( <i>halo</i> and flexible linker cloned in-frame at the N-terminus of <i>yscL</i> ) | this study |
| pBAD:: <i>his/B</i> | pBR322-derived expression vector                                                                              | Invitrogen |
| pKNG101             | $\text{ori}_{\text{R6K}} \text{ sacBR}^+ \text{ oriT}_{\text{RK2}} \text{ strAB}^+$ (suicide vector)          | 6          |

### Supplementary Table 3

#### Determination of expression ratio of soluble T3SS components under different conditions

The maximal intensity of 60 spots from three deconvoluted fields of view per strain in secreting and non-secreting conditions was corrected for the average background fluorescence in 30 unlabelled bacteria under the same conditions. To normalize for differences in exposure conditions and detection sensitivity, the ratio of the raw maximal fluorescence intensity under secreting and non-secreting conditions was normalized using a ratio of 2.45 for YscQ<sup>71</sup>. St.dev., standard deviation between fields of view.

|                  | ratio secr./non-secr. |         | normalized ratio |         |
|------------------|-----------------------|---------|------------------|---------|
|                  |                       | st.dev. |                  | st.dev. |
| <b>EGFP-YscQ</b> | 0,1649                | 0,0257  | <b>2,450</b>     | 0,381   |
| <b>EGFP-YscK</b> | 0,1463                | 0,0240  | <b>2,173</b>     | 0,356   |
| <b>EGFP-YscL</b> | 0,1336                | 0,0336  | <b>1,985</b>     | 0,498   |
| <b>EGFP-YscN</b> | 0,1326                | 0,0185  | <b>1,970</b>     | 0,275   |

## Supplementary Table 4

### Exact number of data points

Exact number of data points, in case a range was given for n in the figure legend or main text

| Dataset           | Experiment                              | Strain / condition         | Variables                                          |                    |
|-------------------|-----------------------------------------|----------------------------|----------------------------------------------------|--------------------|
| Fig. 1e + Table 1 | automated detection of fluorescent foci |                            | number of spots                                    | number of bacteria |
|                   |                                         | wild-type                  | 50                                                 | 285                |
|                   |                                         | EGFP-YscD                  | 2244                                               | 262                |
|                   |                                         | YscV-EGFP                  | 1900                                               | 264                |
|                   |                                         | EGFP-YscQ                  | 3578                                               | 447                |
|                   |                                         | EGFP-YscK                  | 3640                                               | 537                |
|                   |                                         | EGFP-YscL                  | 3347                                               | 473                |
|                   |                                         | EGFP-YscN                  | 1968                                               | 274                |
| Fig. 3a           | FCS determination of transit time       |                            | number of analysed traces meeting quality criteria |                    |
|                   |                                         | EGFP                       | 140                                                |                    |
|                   |                                         | EGFP-YscK                  | 73                                                 |                    |
|                   |                                         | EGFP-YscQ                  | 199                                                |                    |
|                   |                                         | EGFP-YscL                  | 157                                                |                    |
|                   |                                         | EGFP-YscN                  | 86                                                 |                    |
| Fig. 3b           | FCS determination of transit time       |                            | number of analysed traces meeting quality criteria |                    |
|                   |                                         | EGFP-YscK $\Delta$ YscQ    | 54                                                 |                    |
|                   |                                         | EGFP-YscQ $\Delta$ YscN    | 83                                                 |                    |
|                   |                                         | EGFP-YscQ <sub>M218A</sub> | 58                                                 |                    |
|                   |                                         | EGFP-YscL $\Delta$ YscN    | 65                                                 |                    |
|                   |                                         | EGFP-YscL $\Delta$ YscQ    | 79                                                 |                    |
|                   |                                         | EGFP-YscN $\Delta$ YscL    | 86                                                 |                    |
| Fig. 3c           | FCS determination of                    |                            | number of analysed traces                          |                    |

| diffusion coefficient |                                                    | meeting quality criteria                           |
|-----------------------|----------------------------------------------------|----------------------------------------------------|
|                       | EGFP-YscK, secreting                               | 123                                                |
|                       | EGFP-YscK, non-secreting                           | 73                                                 |
|                       | EGFP-YscQ, secreting                               | 142                                                |
|                       | EGFP-YscQ, non-secreting                           | 156                                                |
|                       | EGFP-YscL, secreting                               | 157                                                |
|                       | EGFP-YscL, non-secreting                           | 158                                                |
|                       | EGFP-YscN, secreting                               | 80                                                 |
|                       | EGFP-YscN, non-secreting                           | 85                                                 |
| Fig. 3d, S11          | FCS determination of transit time                  | number of analysed traces meeting quality criteria |
|                       | EGFP-YscQ, secreting (5 mM EDTA)                   | 142                                                |
|                       | EGFP-YscQ, no addition                             | 65                                                 |
|                       | EGFP-YscQ, 1 mM CaCl <sub>2</sub>                  | 64                                                 |
|                       | EGFP-YscQ, non-secreting (5 mM CaCl <sub>2</sub> ) | 156                                                |
|                       | EGFP-YscL, secreting (5 mM EDTA)                   | 157                                                |
|                       | EGFP-YscL, no addition                             | 67                                                 |
|                       | EGFP-YscL, 1 mM CaCl <sub>2</sub>                  | 84                                                 |
|                       | EGFP-YscL, non-secreting (5 mM CaCl <sub>2</sub> ) | 158                                                |
| Results, main text    | FCS, comparison of conditions                      | number of analysed traces meeting quality criteria |
|                       | EGFP, secreting                                    | 79                                                 |
|                       | EGFP, non-secreting                                | 39                                                 |
| Fig. S10de            | FCS determination of transit time                  | number of analysed traces meeting quality criteria |
|                       | EGFP-YscL $\Delta$ YscD                            | 29                                                 |
|                       | EGFP-YscL                                          | 16                                                 |
|                       | EGFP-YscQ $\Delta$ YscD                            | 20                                                 |
|                       | EGFP-YscQ                                          | 13                                                 |

### Supplementary References:

1. Diepold, A., Kudryashev, M., Delalez, N. J., Berry, R. M. & Armitage, J. P. Composition, Formation, and Regulation of the Cytosolic C-ring, a Dynamic Component of the Type III Secretion Injectisome. *PLOS Biol.* **13**, e1002039 (2015).
2. Waithe, D., Clausen, M. P., Sezgin, E. & Eggeling, C. FoCuS-point: software for STED fluorescence correlation and time-gated single photon counting. *Bioinformatics* **32**, 958–60 (2016).
3. Clausen, M. P. *et al.* A straightforward approach for gated STED-FCS to investigate lipid membrane dynamics. *Methods* **88**, 67–75 (2015).
4. Hueck, C. J. Type III protein secretion systems in bacterial pathogens of animals and plants. *Microbiol. Mol. Biol. Rev.* **62**, 379–433 (1998).
5. Kudryashev, M. *et al.* In situ structural analysis of the *Yersinia enterocolitica* injectisome. *Elife* **2**, e00792 (2013).
6. Kaniga, K., Delor, I. & Cornelis, G. R. A wide-host-range suicide vector for improving reverse genetics in gram-negative bacteria: inactivation of the *blaA* gene of *Yersinia enterocolitica*. *Gene* **109**, 137–141 (1991).
